# Supplementary material for: Storage, transport, release: heme versatility in nitrite reductase electron transfer studied by molecular dynamics simulations
Source: Royal Society of Chemistry journal article supplement (doi:10.1039/c4cp04383a), 2015-01-01
Supplement: c4cp04383a1.pdf [file c4cp04383a1.pdf]

## Supplementary information

Storage, transport, release: heme versatility in nitrite reductase electron transfer  
studied by molecular dynamics simulations – heme charges

Anna Bauß and Thorsten Koslowski

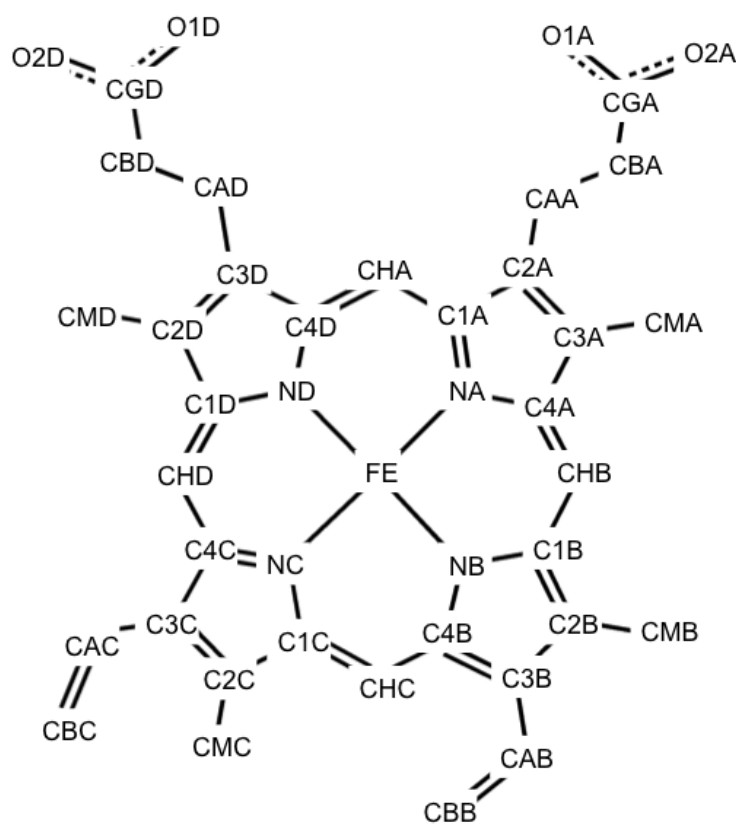

Heme nonhydrogen atom identifiers

## Hydrogen connectivities

|      |     |
|------|-----|
| HM81 | CMA |
| HM82 | CMA |
| HM82 | CMA |
| HDM  | CHB |
| HM11 | CMB |
| HM12 | CMB |
| HM13 | CMB |
| HV2  | CAB |
| HVC2 | CBB |
| HVT2 | CBB |
| HAM  | CHC |
| HM31 | CMC |
| HM32 | CMC |
| HM33 | CMC |
| HV4  | CHC |
| HVC4 | CBC |
| HVT4 | CBC |
| HBM  | CHD |
| HM51 | CMD |
| HM52 | CMD |
| HM53 | CMD |
| HP61 | CAD |
| HP62 | CAD |
| HP63 | CBD |
| HP64 | CBD |
| HGM  | CHA |
| HP71 | CAA |
| HP72 | CAA |
| HP73 | CBA |
| HP74 | CBA |

## Heme charges

| atom ID | heme (Fe II) | heme (Fe III) |
|---------|--------------|---------------|
| FE      | 0.2500       | 0.4473        |
| NA      | -0.1800      | -0.2485       |
| C1A     | 0.0300       | 0.0264        |
| C2A     | -0.0200      | 0.0205        |
| CAA     | -0.1600      | -0.1761       |
| HP71    | 0.1000       | 0.1000        |
| HP72    | 0.1000       | 0.1000        |
| CBA     | -0.3000      | -0.3094       |
| HP73    | 0.1000       | 0.1000        |
| HP74    | 0.1000       | 0.1000        |
| CGA     | 0.3000       | 0.2925        |
| O1A     | -0.5000      | -0.4814       |
| O2A     | -0.5000      | -0.4773       |
| C3A     | 0.0200       | -0.0083       |
| CMA     | -0.2650      | -0.2200       |
| HM81    | 0.0750       | 0.0750        |
| HM82    | 0.0750       | 0.0750        |
| HM83    | 0.0750       | 0.0750        |
| C4A     | 0.0200       | 0.0639        |
| CHB     | -0.1100      | -0.0861       |
| HDM     | 0.1500       | 0.1500        |
| C1B     | 0.0300       | 0.0425        |
| NB      | -0.1800      | -0.0453       |
| C2B     | 0.0200       | 0.0098        |
| CMB     | -0.2650      | -0.2136       |
| HM11    | 0.0750       | 0.0750        |
| HM12    | 0.0750       | 0.0750        |
| HM13    | 0.0750       | 0.0750        |
| C3B     | -0.0500      | 0.0751        |
| CAB     | -0.1300      | -0.1641       |
| HV2     | 0.1500       | 0.1500        |
| CBB     | -0.3000      | -0.2250       |
| HVC2    | 0.1000       | 0.1000        |
| HVT2    | 0.1000       | 0.1000        |
| C4B     | 0.0200       | -0.1197       |
| CHC     | -0.1100      | 0.0221        |
| HAM     | 0.1500       | 0.1500        |
| C1C     | 0.0300       | -0.0383       |
| NC      | -0.1800      | -0.1668       |
| C2C     | 0.0200       | 0.0054        |
| CMC     | -0.2650      | -0.2273       |
| HM31    | 0.0750       | 0.0750        |
| HM32    | 0.0750       | 0.0750        |
| HM33    | 0.0750       | 0.0750        |
| C3C     | -0.0500      | 0.0243        |
| CAC     | -0.1200      | -0.1512       |

|      |         |         |
|------|---------|---------|
| HV4  | 0.1500  | 0.1500  |
| CBC  | -0.3000 | -0.2199 |
| HVC4 | 0.1000  | 0.1000  |
| HVT4 | 0.1000  | 0.1000  |
| C4C  | 0.0200  | -0.0463 |
| CHD  | -0.1100 | -0.0079 |
| HBM  | 0.1500  | 0.1500  |
| C1D  | 0.0300  | -0.0815 |
| ND   | -0.1800 | -0.0709 |
| C2D  | 0.0200  | 0.1146  |
| CMD  | -0.2650 | -0.2184 |
| HM51 | 0.0750  | 0.0750  |
| HM52 | 0.0750  | 0.0750  |
| HM53 | 0.0750  | 0.0750  |
| C3D  | -0.0200 | 0.0882  |
| C4D  | 0.0200  | -0.0654 |
| CHA  | -0.1100 | -0.0413 |
| HGM  | 0.1500  | 0.1500  |
| CAD  | -0.1600 | -0.1851 |
| HP61 | 0.1000  | 0.1000  |
| HP62 | 0.1000  | 0.1000  |
| CBD  | -0.3000 | -0.2979 |
| HP63 | 0.1000  | 0.1000  |
| HP64 | 0.1000  | 0.1000  |
| CGD  | 0.3000  | 0.3156  |
| O1D  | -0.5000 | -0.4814 |
| O2D  | -0.5000 | -0.4737 |
